# Supplementary material for: Relationship Between Parental Big Five And Children’s Ability To Delay Gratification
Source: Springer Nature journal article supplement (doi:10.1007/s10826-021-02196-8), 2021-12-14
Supplement: MOESM1 [file 19961020]

# Supplementary Tables

**Supplementary Table S1**

*Means, standard deviations, and correlation coefficients*

|  |  | *M* | *SD* | 1 | 2 | 3 | 4 | 5 | 6 | 7 | 8 | 9 | 10 | 11 | 12 | 13 | 14 |
| --- | --- | --- | --- | --- | --- | --- | --- | --- | --- | --- | --- | --- | --- | --- | --- | --- | --- |
| 1 | Waiting time a | 5.34 | 5.05 | 1 |  |  |  |  |  |  |  |  |  |  |  |  |  |
| 2 | Neuroticism, mother | 1.37 | 0.78 | .040 | 1 |  |  |  |  |  |  |  |  |  |  |  |  |
| 3 | Extraversion, mother | 2.33 | 0.55 | -.083 | -.41** | 1 |  |  |  |  |  |  |  |  |  |  |  |
| 4 | Openness, mother | 2.05 | 0.76 | -.083 | -.14* | .20** | 1 |  |  |  |  |  |  |  |  |  |  |
| 5 | Agreeableness, mother | 2.83 | 0.67 | .041 | -.44** | .14** | .21** | 1 |  |  |  |  |  |  |  |  |  |
| 6 | Conscientiousness, mother | 3.04 | 0.62 | -.061 | -.48** | .23** | .094 | .48** | 1 |  |  |  |  |  |  |  |  |
| 7 | Neuroticism, father b | 0.97 | 0.66 | -.037 | .075 | -.039 | .055 | .031 | .004 | 1 |  |  |  |  |  |  |  |
| 8 | Extraversion, father b | 2.36 | 0.60 | .062 | -.087 | .12* | -.004 | .008 | .097 | -.39** | 1 |  |  |  |  |  |  |
| 9 | Openness, father b | 2.26 | 0.75 | .13* | -.080 | -.005 | .19** | .067 | .044 | -.048 | .13** | 1 |  |  |  |  |  |
| 10 | Agreeableness, father b | 2.77 | 0.64 | .14* | -.064 | .038 | .057 | .19** | .14* | -.16* | .061 | -.035 | 1 |  |  |  |  |
| 11 | Conscientiousness, father b | 2.97 | 0.56 | .11+ | -.13* | .058 | .032 | .029 | .11+ | -.42** | .26** | .080 | .19** | 1 |  |  |  |
| 12 | Age of the child c | 45.02 | 1.01 | .12* | .18** | -.033 | .037 | -.18** | -.16** | -.057 | -.010 | .039 | -.062 | .064 | 1 |  |  |
| 13 | Years of education, mother | 14.66 | 2.29 | .16** | -.21** | .12* | .30** | .14** | .10+ | -.005 | .11+ | .14* | .10+ | -.092 | -.050 | 1 |  |
| 14 | Years of education, father b | 14.75 | 2.20 | .16** | -.19** | .055 | .079 | .11+ | .099 | -.10+ | .069 | .25** | .016 | .031 | -.060 | .59** | 1 |
|  | *Note.* ***p*<.01 **p*<.05 +*p*<.1 (two-sided), *N*=329.  a in minutes. b *n*=267. c in months. | | | | | | | | | | | | | | | | |
