# Supplementary figures and images for: Relationship Between Parental Big Five And Children’s Ability To Delay Gratification
Source: Springer Nature journal article supplement (doi:10.1007/s10826-021-02196-8), 2021-12-14

# Supplementary Figures

**Supplementary Figure S2**

*Distribution of the waiting time in minutes*


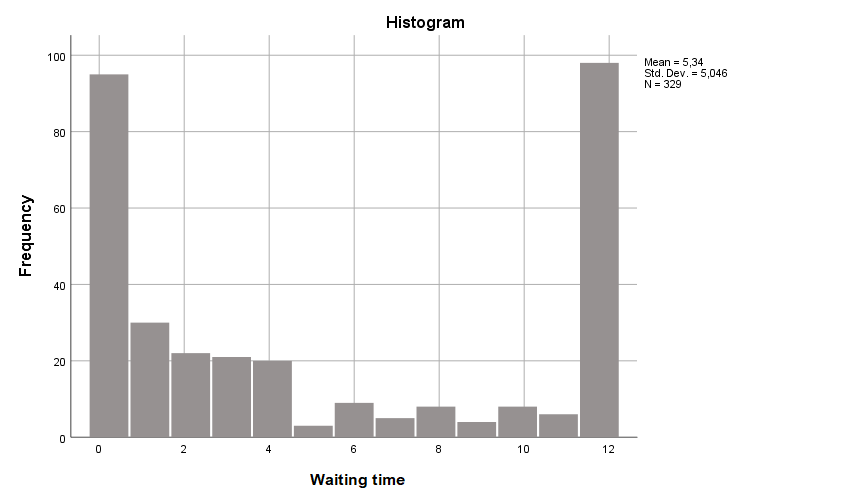

Supplement: MOESM2 [file 19961020]
